# Supplementary material for: Various Silver Nanostructures on Sapphire Using Plasmon Self-Assembly and Dewetting of Thin Films
Source: Nanomicro Lett. 2016 Nov 28;9:17. doi: 10.1007/s40820-016-0120-6 (PMC6225926; doi:10.1007/s40820-016-0120-6)
Supplement: Supplementary file 1 — Supplementary material 1 (PDF 2352 kb) [file 40820_2016_120_MOESM1_ESM.pdf]

Supplementary Information for

## Various Silver Nanostructures on Sapphire Using Plasmon Self-Assembly and Dewetting of Thin Films

Sundar Kunwar<sup>1</sup>, Mao Sui<sup>1</sup>, Quanzhen Zhang<sup>1</sup>, Puran Pandey<sup>1</sup>, Ming-Yu Li<sup>1</sup>, Jihoon Lee<sup>1,2,\*</sup>

<sup>1</sup>College of Electronics and Information, Kwangwoon University, Nowon-gu Seoul 01897, South Korea

<sup>2</sup>Institute of Nanoscale Science and Engineering, University of Arkansas, Fayetteville AR 72701, USA

\*Corresponding author. E-mail: jihoonleenano@gmail.com

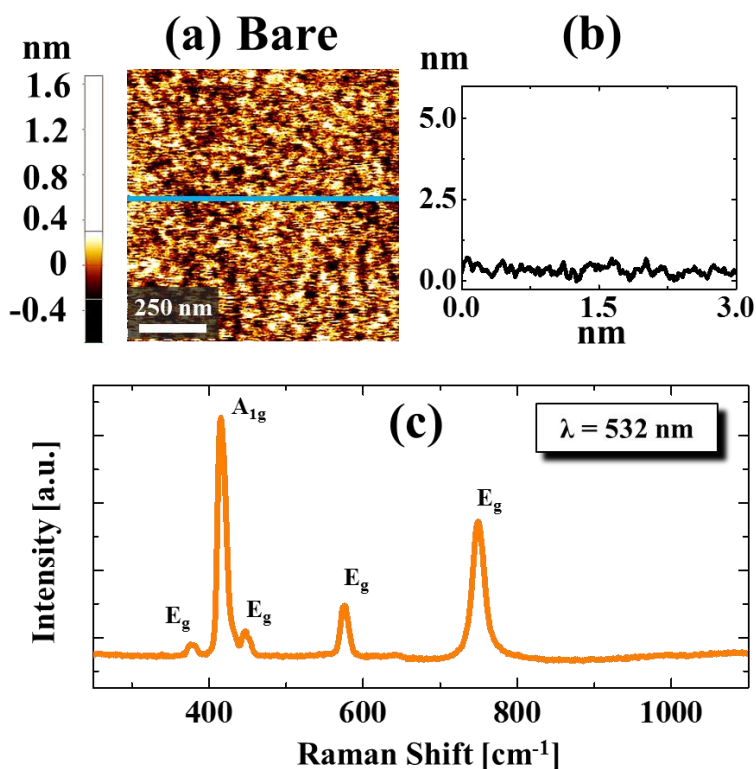

**Fig. S1** **a** Surface morphology of bare sapphire (0001) after degassing. **b** Cross-sectional line profile in reference to the line in **a**. **c** Raman spectrum of bare sapphire depicting the five vibration modes as labeled at 416.53 (A<sub>1g</sub>), 378.24, 446.83, 575.78, and 749.65 cm<sup>-1</sup> (E<sub>g</sub>). The spectra were measured under the excitation of 532 nm with 220 mW at an ambient condition

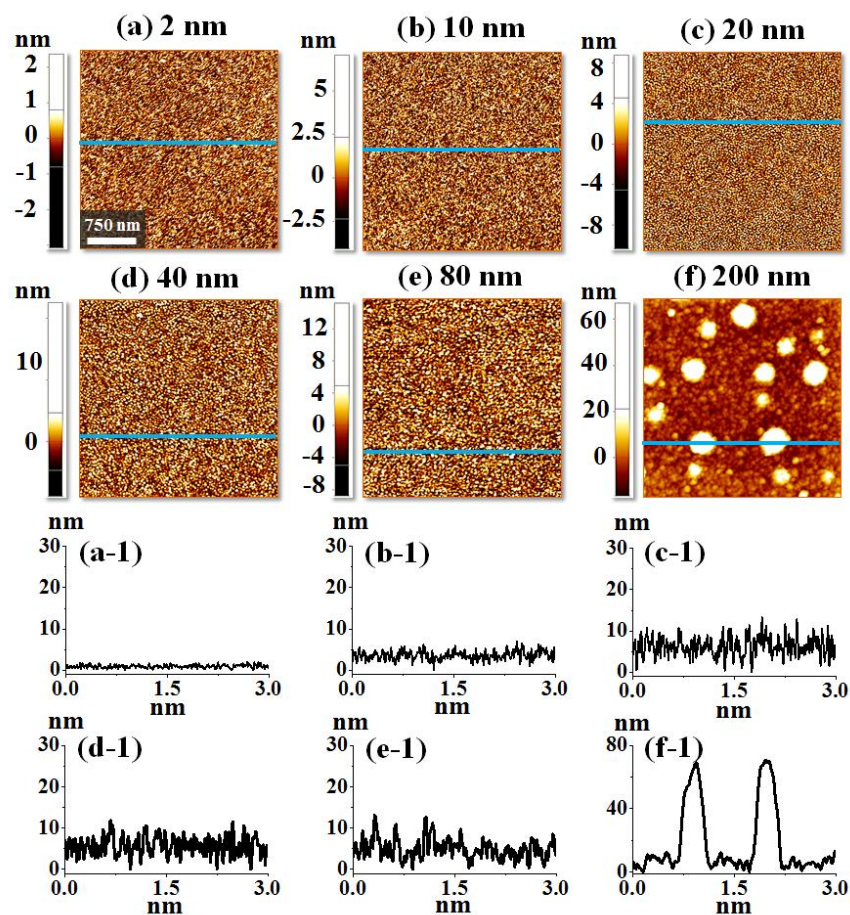

**Fig. S2 a-f** Surface morphology evolution of the samples before annealing, deposited with the various thickness of Ag between 2 and 200 nm as labelled. **(a-1)-(f-1)** Cross-sectional line profiles in references to the AFM top-views in **a-f**

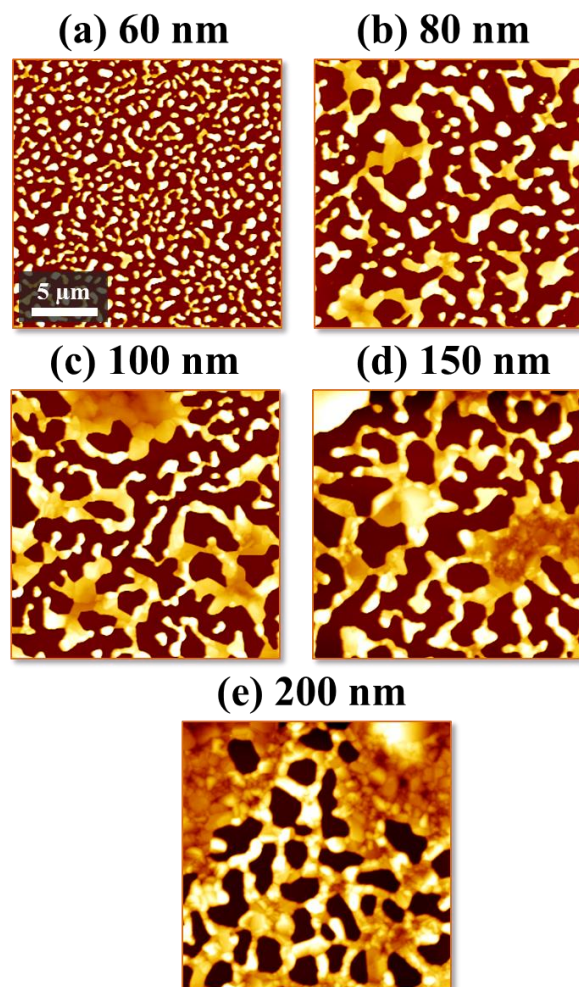

**Fig. S3** Evolution of nanoclusters networks in large-scale AFM top-views: annealed at 550 °C for 180 s with the deposition amount variation between 60 and 200 nm

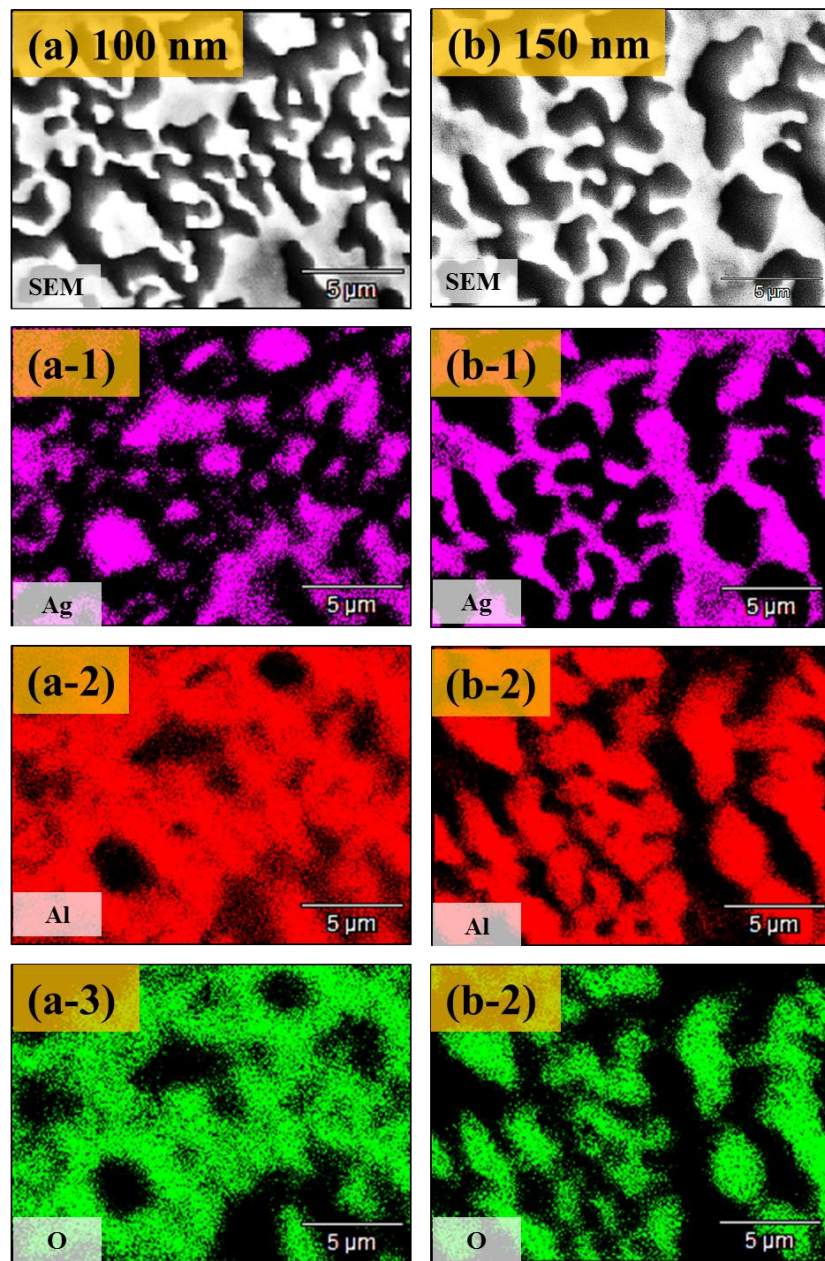

**Fig. S4** EDS phase maps showing the distinct phase of elements (Ag, Al, and O) presented in the samples with the deposition of 100 nm (**a** - panel) and 150 nm (**b** - panel) annealed at 550 °C for 180 s

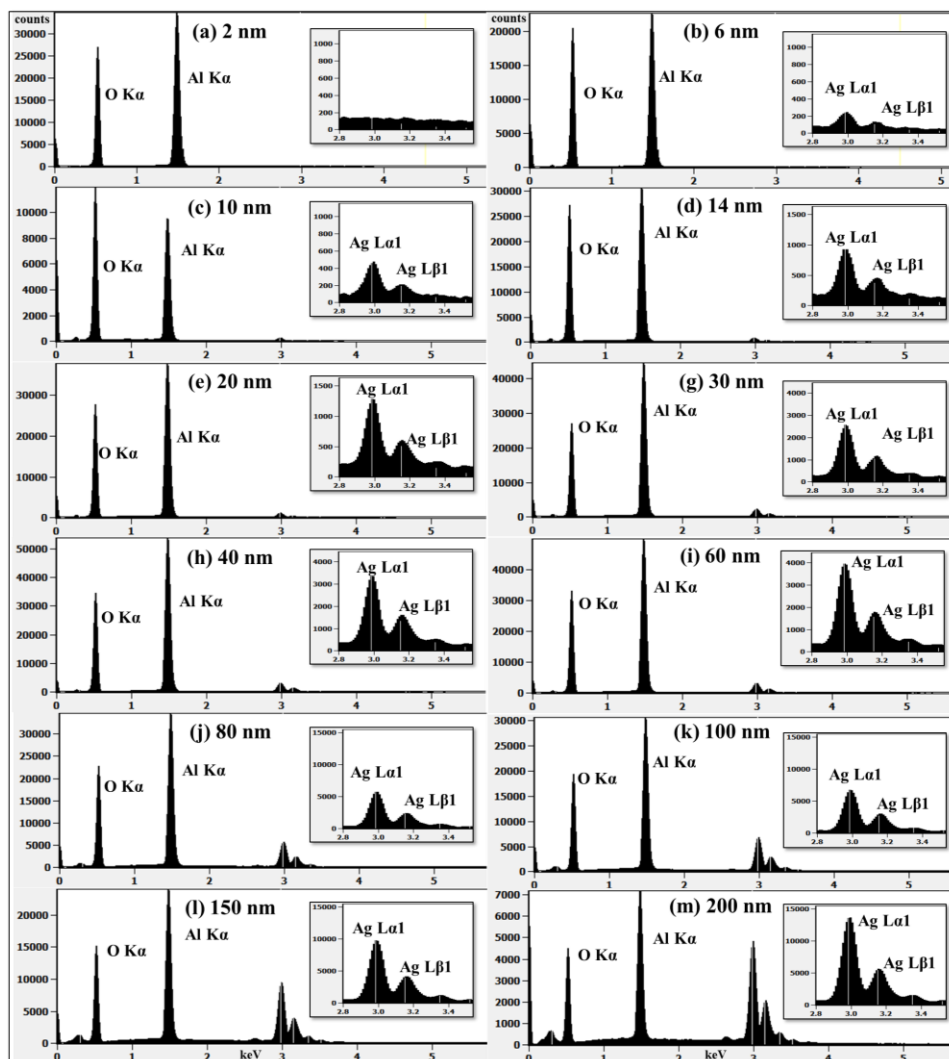

**Fig. S5** EDS spectra of the samples within the range of 0-5.5 keV annealed at 550 °C for 180 s with the deposition amount variation from 2 to 200 nm. Insets show the detail of the Ag peaks between 2.8 – 3.4 keV

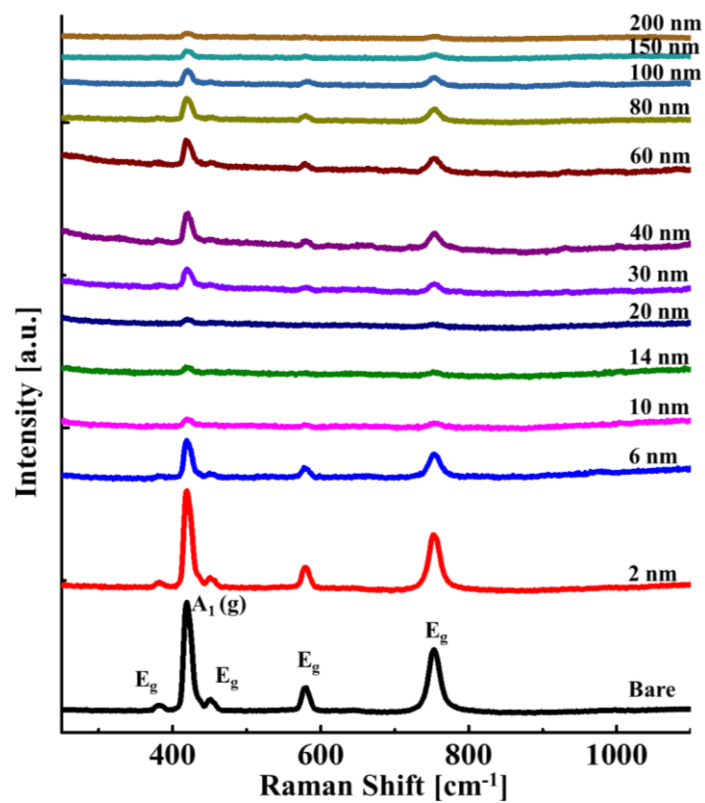

**Fig. S6** Raman spectra of the samples annealed at 550 °C for 180 s by controlling the deposition amount as labelled (2-200 nm)

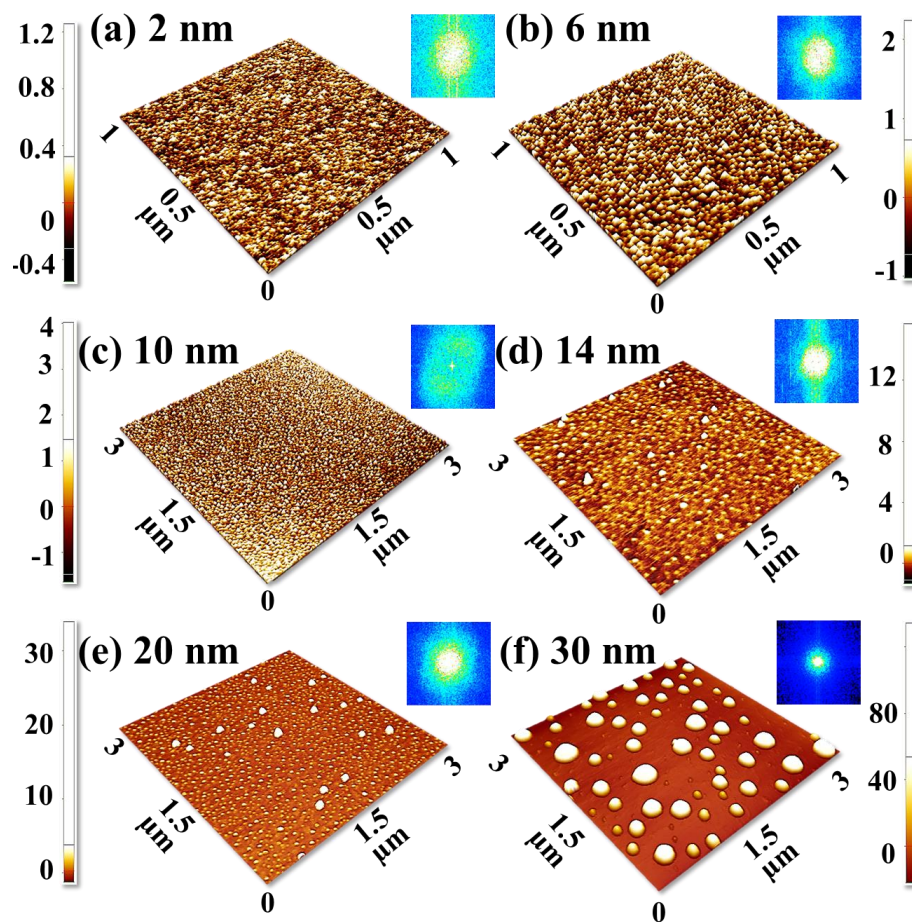

**Fig. S7** AFM 3D-side views of tiny compact to large isolated Ag NPs on sapphire (0001) after annealing at 750 °C for 180 s by the variation of deposition thickness from 2 to 30 nm. Insets show the FFT power spectra of the corresponding AFM images

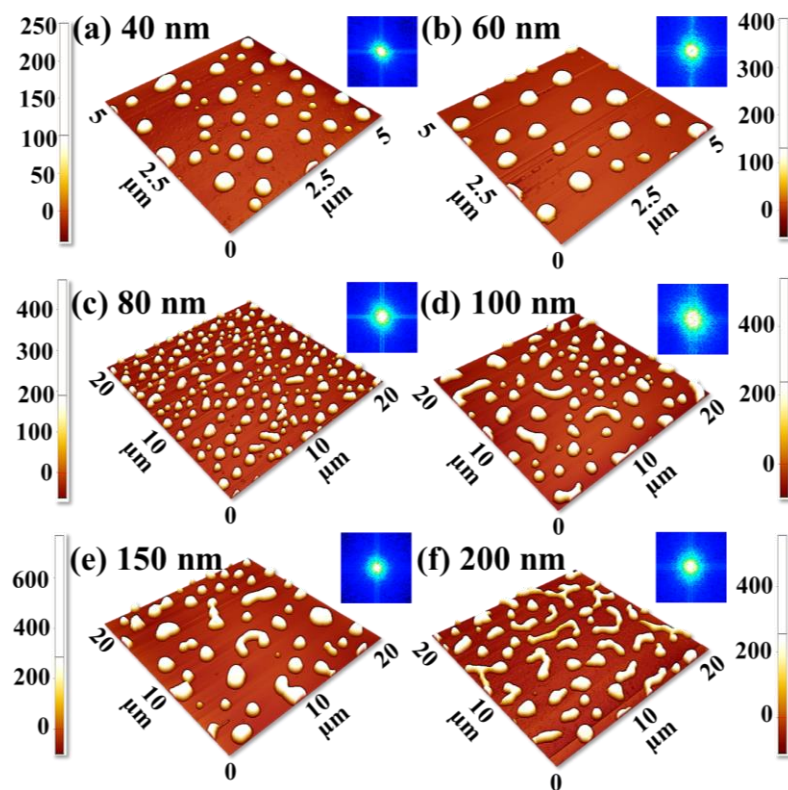

**Fig. S8** Evolution from large isolated Ag NPs to the merged Ag nanostructures on sapphire (0001) by the control of deposition amount (40-200 nm) annealed at 750 °C for 180 s. Insets represent the 2D FFT power spectra of corresponding AFM images

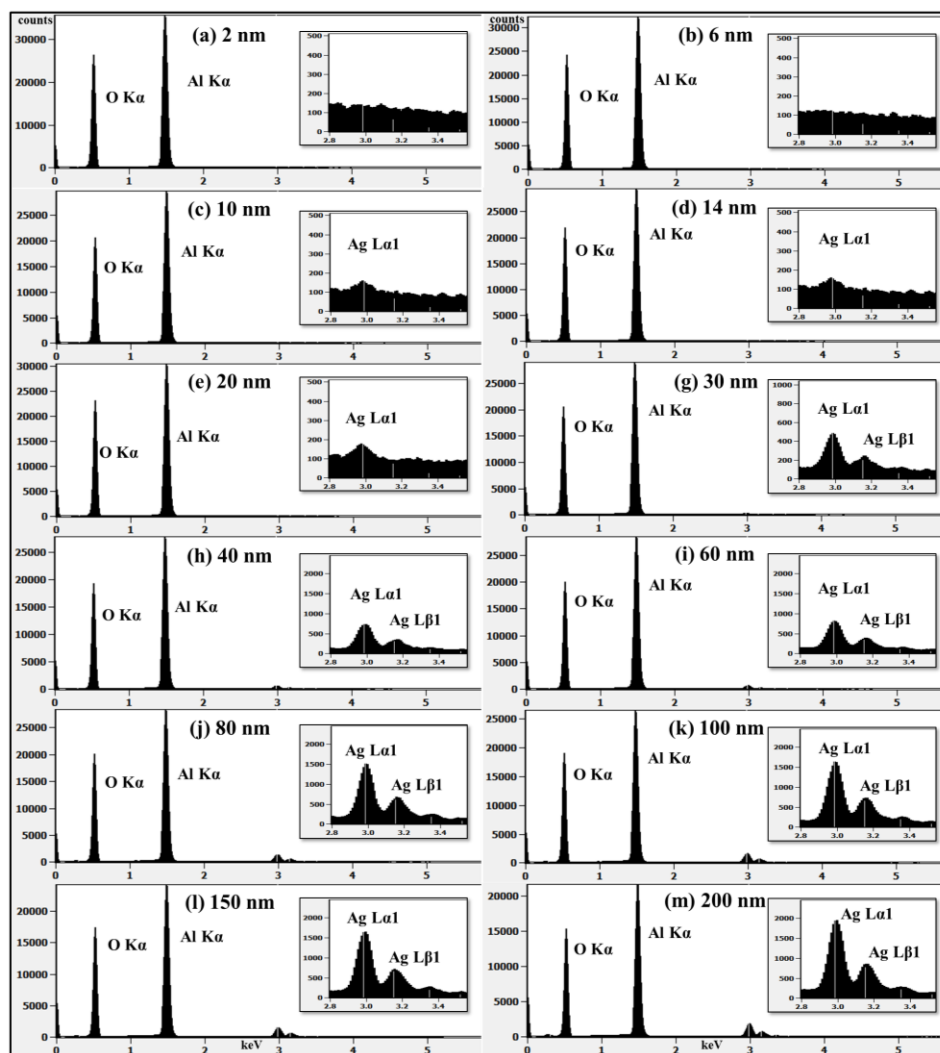

**Fig. S9** Full range EDS spectra showing the Al, O, and Ag peaks within 0-5.5 keV of samples annealed at 750 °C for 180 s with the deposition amount as labelled. The enlarged views of Ag La1 and Ag Lβ1 are presented as insets

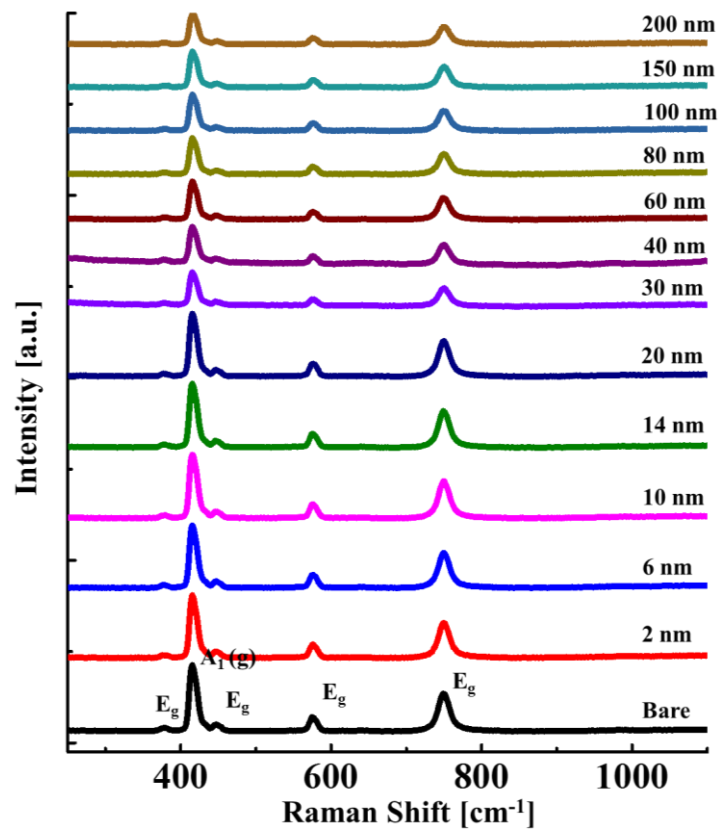

**Fig. S10** Raman spectra of the samples fabricated with various Ag nanostructures at 750 °C for 180 s by the Ag thickness between 2 and 200 nm

**Table S1** Summary of RMS roughness ( $R_q$ ) and surface area ratio (SAR) of the samples annealed at 550 and 750 °C for equal 180 s with the variation of deposition thickness between 2 and 200 nm

| Deposition Amount [nm] | Annealing Temperature (°C) |         |            |         |
|------------------------|----------------------------|---------|------------|---------|
|                        | 550 °C                     |         | 750 °C     |         |
|                        | $R_q$ (nm)                 | SAR (%) | $R_q$ (nm) | SAR (%) |
| <b>2</b>               | 1.522                      | 5.18    | 0.19       | 0.13    |
| <b>6</b>               | 2.049                      | 8.53    | 0.48       | 0.54    |
| <b>10</b>              | 4.63                       | 20.18   | 0.74       | 0.85    |
| <b>14</b>              | 9.34                       | 20.17   | 3.45       | 1.72    |
| <b>20</b>              | 13.52                      | 24.60   | 1.38       | 0.49    |
| <b>30</b>              | 36.88                      | 23.1    | 27.46      | 13.33   |
| <b>40</b>              | 55.51                      | 19.82   | 51.78      | 15.15   |
| <b>60</b>              | 67.86                      | 14.70   | 58.69      | 12.14   |
| <b>80</b>              | 94.82                      | 11.76   | 96.90      | 12.97   |
| <b>100</b>             | 92.87                      | 10.1    | 121.75     | 10.75   |
| <b>150</b>             | 127.67                     | 11.78   | 145.75     | 10.46   |
| <b>200</b>             | 121.1                      | 9.34    | 138.47     | 9.93    |

**Table S2** Summary of average reflectance with respect to the deposition amount from 2 to 200 nm after annealing at 550 and 750 °C for 180 s

| <b>Deposition<br/>Amount<br/>[nm]</b> | <b>Reflectance (%)</b> |               |
|---------------------------------------|------------------------|---------------|
|                                       | <b>550 °C</b>          | <b>750 °C</b> |
| <b>Bare</b>                           | 8.97                   | 8.97          |
| <b>2</b>                              | 7.64                   | 8.52          |
| <b>6</b>                              | 14.15                  | 8.04          |
| <b>10</b>                             | 25.35                  | 6.52          |
| <b>14</b>                             | 23.88                  | 8.31          |
| <b>20</b>                             | 33.92                  | 8.28          |
| <b>30</b>                             | 19.76                  | 9.96          |
| <b>40</b>                             | 12.50                  | 7.89          |
| <b>60</b>                             | 4.36                   | 6.04          |
| <b>80</b>                             | 3.33                   | 4.94          |
| <b>100</b>                            | 4.76                   | 4.49          |
| <b>150</b>                            | 9.49                   | 6.06          |
| <b>200</b>                            | 14.08                  | 4.76          |

**Table S3** Summary of Raman  $A_1(g)$  phonon mode at  $416.4\text{ cm}^{-1}$ : peak intensity, peak shift and FWHM of the samples with the variation of deposition amount from 2 to 200 nm, annealed at 550 and 750 °C for 180 s

| Deposition Amount (nm) | Annealing Temperature (°C) |                            |                           |                  |                            |                           |
|------------------------|----------------------------|----------------------------|---------------------------|------------------|----------------------------|---------------------------|
|                        | 550 °C                     |                            |                           | 750 °C           |                            |                           |
|                        | Intensity (a.u.)           | Shift ( $\text{cm}^{-1}$ ) | FWHM ( $\text{cm}^{-1}$ ) | Intensity (a.u.) | Shift ( $\text{cm}^{-1}$ ) | FWHM ( $\text{cm}^{-1}$ ) |
| <b>Bare</b>            | 6923.86                    | 416.55                     | 12.16                     | 6923.86          | 416.55                     | 12.16                     |
| <b>2</b>               | 6190.54                    | 416.65                     | 11.97                     | 6567.96          | 416.94                     | 11.94                     |
| <b>6</b>               | 2382.80                    | 416.68                     | 11.96                     | 6647.11          | 416.87                     | 12.00                     |
| <b>10</b>              | 419.00                     | 416.07                     | 13.33                     | 6802.33          | 416.95                     | 12.21                     |
| <b>14</b>              | 334.83                     | 416.58                     | 11.62                     | 6764.18          | 416.86                     | 12.10                     |
| <b>20</b>              | 259.44                     | 417.05                     | 11.94                     | 6654.53          | 416.93                     | 12.01                     |
| <b>30</b>              | 1120.49                    | 416.85                     | 12.75                     | 3421.70          | 417.00                     | 12.17                     |
| <b>40</b>              | 1827.66                    | 416.98                     | 12.00                     | 3764.08          | 417.01                     | 12.39                     |
| <b>60</b>              | 1558.09                    | 416.81                     | 12.16                     | 4016.90          | 417.01                     | 12.16                     |
| <b>80</b>              | 1367.32                    | 416.66                     | 12.32                     | 3824.96          | 417.14                     | 12.31                     |
| <b>100</b>             | 874.42                     | 416.92                     | 12.14                     | 3811.80          | 417.17                     | 12.39                     |
| <b>150</b>             | 423.92                     | 416.20                     | 12.52                     | 3797.68          | 417.20                     | 12.34                     |
| <b>200</b>             | 249.86                     | 416.87                     | 11.82                     | 3272.51          | 417.29                     | 12.39                     |
